# Supplementary material for: The Use of Membrane Filtration to Increase Native Whey Proteins in Infant Formula
Source: MDPI journal article supplement (doi:10.3390/dairy2040041), 2021-09-23
Supplement: s1 [file s1]

Archive with 1 entries (1 files):
- dairy-1362379-supplementary.pdf
